# Precision engineering of biological function with large-scale measurements and machine learning

Authors: Drew S. Tack<sup>1</sup>, Peter D. Tonner<sup>1</sup>, Abe Pressman<sup>1</sup>, Nathanael D. Olson<sup>1</sup>, Sasha F. Levy<sup>2,3</sup>, Eugenia F. Romantseva<sup>1</sup>, Nina Alperovich<sup>1</sup>, Olga Vasilyeva<sup>1</sup>, David Ross<sup>1\*</sup>

## Affiliations

1. National Institute of Standards and Technology, Gaithersburg, MD, 20899, USA
2. SLAC National Accelerator Laboratory, Menlo Park, CA, 94025, USA
3. Joint Initiative for Metrology in Biology, Stanford, CA, 94305, USA

\*Correspondence to: david.ross@nist.gov.

## Abstract

As synthetic biology expands and accelerates into real-world applications, methods for quantitatively and precisely engineering biological function become increasingly relevant. This is particularly true for applications that require programmed sensing to dynamically regulate gene expression in response to stimuli. However, few methods have been described that can engineer biological sensing with any level of quantitative precision. Here, we present two complementary methods for precision engineering of genetic sensors: *in silico* selection and machine-learning-enabled forward engineering. Both methods use a large-scale genotype-phenotype dataset to identify DNA sequences that encode sensors with quantitatively specified dose response. First, we show that *in silico* selection can be used to engineer sensors with a wide range of dose-response curves. To demonstrate *in silico* selection for precise, multi-objective engineering, we simultaneously tune a genetic sensor's sensitivity ( $EC_{50}$ ) and saturating output to meet quantitative specifications. In addition, we engineer sensors with inverted dose-response and specified  $EC_{50}$ . Second, we demonstrate a machine-learning-enabled approach to predictively engineer genetic sensors with mutation combinations that are not present in the large-scale dataset. We show that the interpretable machine learning results can be combined with a biophysical model to engineer sensors with improved inverted dose-response curves.

## Introduction

As the field of synthetic biology transitions from a qualitative, trial-and-error endeavour into a mature engineering discipline, methods that enable the engineering of biological function with quantitative precision are required, i.e., to produce an outcome that meets a quantitative specification. This need is particularly acute for genetic sensors, which form the basis for synthetic gene circuits and related approaches for programming cells to regulate gene expression dynamically in response to environmental stimuli.

Most efforts to engineer genetic sensors have been qualitative in nature, e.g., demonstrations of new sensor architectures or sensors that respond to new inputs [1-6]. Those qualitative demonstrations are the necessary first steps in developing a toolkit of sensors for synthetic biology and for demonstrating the variety of cellular control circuits enabled by genetic sensors. However, for many applications, genetic sensors will also need to be engineered with a quantitatively specified dose-response curve

40 matched to each application [2, 4, 7-10]. That dose-response curve is typically described using a version  
41 of the Hill equation:

$$G(L) = G_0 + \frac{G_\infty - G_0}{1 + \left(\frac{EC_{50}}{L}\right)^n},$$

42 where  $L$  is the input signal level (e.g., concentration of ligand);  $G(L)$  is the regulated gene expression  
43 output from the sensor as a function of the input signal;  $G_0$  is the basal output level;  $G_\infty$  is the saturating  
44 output level;  $EC_{50}$  is the input level required to give an output midway between  $G_0$  and  $G_\infty$ ; and  $n$  is the  
45 Hill coefficient, which quantifies the steepness of the dose response.

46 Although the importance of tuning the dose response of genetic sensors has been recognized for  
47 applications such as engineered living therapeutics, dynamic pathway control, and enzyme engineering  
48 [2, 4, 7-9, 11, 12], very few methods have been described that can accomplish the required tuning with  
49 any level of quantitative precision or accuracy. With RNA-based genetic sensors (e.g., riboswitches), the  
50 relatively predictable biophysics of base-pair interactions has enabled methods to engineer new sensors  
51 with quantitatively predictable  $G_0$  and  $G_\infty$  [13, 14]. For protein-based genetic sensors, general guidelines  
52 have been given for tuning dose-response curves [7, 10, 15, 16], and several methods have been  
53 demonstrated to improve sensor performance by reducing  $EC_{50}$  or increasing the dynamic range ( $G_\infty/G_0$ )  
54 [17-26]. But no methods have yet been described that can engineer protein-based sensors with specific  
55 quantitative values for the parameters of the Hill equation.

56 Here, we leverage a large-scale, genotype-phenotype dataset to demonstrate two methods for  
57 quantitatively precise engineering of protein-based genetic sensors: *in silico* selection, and forward  
58 engineering enabled by machine-learning (ML). With *in silico* selection, we mine the large-scale dataset  
59 to find DNA sequences that encode genetic sensors that meet quantitative specifications. We show that  
60 *in silico* selection can be used to engineer genetic sensors with  $EC_{50}$  values spanning a wide range (from  
61 3  $\mu\text{mol/L}$  to over 1000  $\mu\text{mol/L}$ ) and with quantitative accuracy (within about 1.3-fold). In addition, we  
62 demonstrate *in silico* selection for precise, multi-objective engineering: first, by engineering genetic  
63 sensors with both  $EC_{50}$  and  $G_\infty$  within about 1.2-fold of specified values; and second, by engineering  
64 sensors with inverted dose-response and  $EC_{50}$  within about 2-fold of specified values. With ML-enabled  
65 forward engineering, we use the large-scale dataset to train an interpretable ML model, and we show  
66 that the model can predict both  $EC_{50}$  and  $G_\infty$  for novel combinations of mutations, also with high  
67 accuracy (within 1.9-fold and 1.2-fold for  $EC_{50}$  and  $G_\infty$ , respectively). Finally, we use results from the  
68 interpretable ML model in combination with guidance from a biophysical model, to engineer new  
69 inverted LacI variants with improved  $EC_{50}$  and  $G_\infty$ .

## 70 Results

71 Many previous publications have described the effects of protein mutations on genetic sensor dose-  
72 response curves. However, we are not aware of any previous work that has demonstrated the use of  
73 protein mutations to tune a genetic sensor dose-response curve to meet quantitative specifications. So,  
74 the objectives of this manuscript are to demonstrate methods whereby protein mutations can be used  
75 for quantitative tuning of dose-response curves and to test the accuracy and precision of those  
76 methods. To that end, the primary statistic we will use to assess different methods is the fold-accuracy:  
77  $\exp[\text{RMSE}(\ln(x))]$ , where  $x$  is the parameter to be tuned (e.g.,  $EC_{50}$ ,  $G_\infty$  from the Hill equation), and

78  $RMSE(\ln(x))$  is the root-mean-square difference between the logarithm of the actual value of  $x$  and the  
79 logarithm of the targeted or predicted value of  $x$ . We use the logarithmic scale to assess accuracy  
80 because the parameters of a genetic sensor dose-response curve can span multiple orders of magnitude  
81 and because the resulting fold-accuracy is the most suitable metric for applications of engineered  
82 genetic regulatory networks [27].

83 The methods we demonstrate here both require a large-scale genotype-phenotype dataset as a starting  
84 point (e.g., deep mutational scanning). For that, we used a recently published dataset that contains  
85 dose-response curves for over 60,000 variants of a protein-based genetic sensor, the *lac* repressor,  
86 LacI [28]. Briefly, to create the large-scale genotype-phenotype dataset, error-prone PCR was used to  
87 generate a library of LacI variants with an average of 7.0 DNA mutations and 4.4 missense mutations  
88 (i.e., amino acid substitutions) per coding sequence. The library was barcoded and a growth-based  
89 barcode counting assay was used to measure the dose-response curve,  $G(L)$ , for every variant in the  
90 library. Each dose-response curve was fit to the Hill equation to provide estimates for the Hill equation  
91 parameters and their associated uncertainties. In addition, long-read sequencing was used to measure  
92 the full-length protein coding sequence for each barcoded variant.

### 93 Precision engineering via *in silico* selection

94 The concept of *in silico* selection is fairly simple: use the large-scale dataset as a lookup table to identify  
95 variants with desired phenotypes along with their matching genotypes. That information can then be  
96 used to synthesize DNA sequences that will result in the required protein phenotype (i.e., dose-response  
97 curve). The keys to successful precision engineering with *in silico* selection are the number of measured  
98 variants and the diversity of phenotypes spanned by the large-scale dataset. The dataset must include  
99 sufficient diversity to cover the range of functional outcomes needed for the engineering objectives. For  
100 example, the LacI dataset includes variants with  $EC_{50}$  values from less than 1  $\mu\text{mol/L}$  to over  
101 1000  $\mu\text{mol/L}$  (Fig 1). So, with that dataset, it should be possible to engineer LacI variants with a wide  
102 range of  $EC_{50}$  values. As a first test of the *in silico* selection approach, we used the genotype-phenotype  
103 dataset to identify a set of LacI variants with  $EC_{50}$  ranging from about 3  $\mu\text{mol/L}$  to over 1000  $\mu\text{mol/L}$  (and  
104 with  $G_0$  and  $G_\infty$  near the wild-type values). For each of those variants, we then synthesized the LacI  
105 coding sequence, integrated it into a plasmid where it regulated the expression of a fluorescent protein,  
106 and measured the resulting *in vivo* dose-response curves using flow cytometry (Fig 2A). The results  
107 indicate a fold-accuracy of 1.67 for engineering LacI variants with different  $EC_{50}$  values (Fig 2B; where we  
108 calculate the fold-accuracy as described above, using  $EC_{50}$  reported in the large-scale dataset as the  
109 predicted values and  $EC_{50}$  determined by flow cytometry as the actual values). However, there is a  
110 systematic error between the cytometry measurements and the large-scale dataset: at low  $EC_{50}$ , the  
111 cytometry result tends to be higher than the large-scale result, while at high  $EC_{50}$ , the cytometry result  
112 tends to be lower (Fig 2C). After correcting for this systematic error (using a linear fit to the  $\ln(EC_{50})$  data  
113 shown in Fig 2B for the predicted values), we calculate a best-case fold-accuracy of 1.31 for *in silico*  
114 selection of  $EC_{50}$ .

115 In addition to providing quantitative accuracy and precision for a single phenotypic parameter, *in silico*  
116 selection is particularly well suited to multi-objective optimization of protein function. With *in silico*  
117 selection, one can simply search the large-scale dataset for sequence variants that satisfy multiple  
118 criteria simultaneously. This avoids the need for complicated multi-objective Darwinian selection  
119 schemes that are necessary for directed evolution. Both  $EC_{50}$  and  $G_\infty$  need to be quantitatively tuned for

120 optimal dynamic control of a metabolic pathway using a genetic sensor [9]. So, to demonstrate multi-  
121 objective optimization with *in silico* selection, we first defined a set of quantitative specifications for  
122  $EC_{50}$  and  $G_{\infty}$ . For those specifications, we chose a grid of  $EC_{50}$  and  $G_{\infty}$  values with  $EC_{50}$  equal  
123 to 10  $\mu\text{mol/L}$ , 30  $\mu\text{mol/L}$ , or 100  $\mu\text{mol/L}$ , and with  $G_{\infty}$  equal to 16 kMEF or 25 kMEF (the units, MEF, are  
124 molecules of equivalent fluorescein from the calibration of cytometry data with fluorescent beads, see  
125 Materials and Methods). Next, we used the large-scale dataset to identify the DNA sequences most  
126 likely to encode LacI variants with both  $EC_{50}$  and  $G_{\infty}$  close to the specified values (after correcting for the  
127 systematic error in  $EC_{50}$ ). In most cases, we chose the top three sequences for each specification (ranked  
128 by the probability of  $EC_{50}$  within 1.2-fold and  $G_{\infty}$  within 1.1-fold of the target, based on the large-scale  
129 measurement uncertainty). For  $EC_{50} = 100 \mu\text{mol/L}$ ,  $G_{\infty} = 16 \text{ kMEF}$ , the top two sequences were very  
130 similar (encoding for the missense mutation V95M, plus mutations to the disordered loops near the LacI  
131 tetramer helix), so for this specification, we also chose the fourth-ranked sequence. The specification  
132  $EC_{50} = 100 \mu\text{mol/L}$ ,  $G_{\infty} = 25 \text{ kMEF}$  is very close to the wild-type LacI phenotype, so we did not choose any  
133 sequences for that specification. We then synthesized each sequence, integrated it into a plasmid where  
134 it regulated the expression of a fluorescent protein, and measured the resulting *in vivo* dose-response  
135 curves using flow cytometry (Fig 3A). Comparing the cytometry results with the corresponding multi-  
136 objective specifications, the *in silico* selection approach showed good performance, with 1.22-fold and  
137 1.14-fold accuracy for  $EC_{50}$  and  $G_{\infty}$ , respectively. However, there was some systematic deviation from  
138 the targeted  $G_{\infty}$  for specifications with  $G_{\infty} = 25 \text{ kMEF}$  (Fig 3B).

139 As a final test of the *in silico* selection approach, we used it to engineer LacI variants with inverted dose-  
140 response ( $G_{\infty} < G_0$ ) and with specified  $EC_{50}$ . To identify sequences from the large-scale dataset, we used  
141 criteria similar to those described above to choose the sequences most likely to encode inverted LacI  
142 variants with  $EC_{50}$  equal to 10  $\mu\text{mol/L}$ , 30  $\mu\text{mol/L}$ , or 100  $\mu\text{mol/L}$ . The dataset contains a much lower  
143 density of inverted variants (Fig 1C,  $G_{\infty}/G_0 < 1$ ). So, for each target specification, there was only a single  
144 sequence with a greater than 10% probability of having an  $EC_{50}$  within 1.5-fold of the targeted value  
145 (based on the uncertainty of the large-scale results). The sparsity of inverted variants is at least partially  
146 due to the FACS pre-screening that was applied before the large-scale measurement to reduce the  
147 fraction of variants with high  $G_0$  [28], which would have removed all inverted variants from the  
148 measured library had it been perfectly efficient.

149 As before, we synthesized the sequences identified by *in silico* selection, and we measured the *in vivo*  
150 dose-response curves for the resulting LacI variants with flow cytometry (Fig 4A). All three variants had  
151 inverted dose-response curves with  $G_0$  and  $G_{\infty}$  satisfying the targeted specification ( $G_0$  within 1.3-fold of  
152 25 kMEF and  $G_{\infty} < 12.5 \text{ kMEF}$ , Fig 4B). However, for each of the sequences, the resulting  $EC_{50}$  was higher  
153 than the targeted values (by 1.9-fold, 2.6-fold, and 1.6-fold for targeted  $EC_{50}$  of 10  $\mu\text{mol/L}$ , 30  $\mu\text{mol/L}$ ,  
154 and 100  $\mu\text{mol/L}$ , respectively).

155 To determine whether the deviations from the targeted  $EC_{50}$  were due to systematic errors in the large-  
156 scale measurement, we synthesized and measured the dose-response for eight additional sequences,  
157 selected only based on the inverted phenotype (without a specified  $EC_{50}$ ). The cytometry results confirm  
158 that all eight variants have inverted dose-response curves (Fig 5). Furthermore, the results indicate an  
159 accuracy of 2.8-fold for  $EC_{50}$  of the inverted variants, with no systematic bias (Fig 6). The lower accuracy  
160 for the inverted variants (compared with the results in Fig 2B) is consistent with the estimated  
161 uncertainty of the large-scale measurements, and is due to the FACS pre-screening, which reduced the  
162 number of barcode reads associated with each inverted variant.

## 163 ML-enabled forward engineering

164 For some applications, it can be important to predict the phenotype resulting from combinations of  
165 mutations that are not present in the large-scale dataset (e.g., to apply sequence constraints that could  
166 not be easily applied during construction of the large-scale library). In those situations, the large-scale  
167 data can be used to train a machine-learning (ML) models that can then be used to predict the  
168 phenotype resulting from novel combinations of mutations. To demonstrate this approach, we used the  
169 large-scale Lacl dataset to train an ML model using LANTERN, a recently described approach that learns  
170 interpretable models of genotype-phenotype landscapes and that also provides good predictive  
171 accuracy (e.g., as good or better than neural network models) [29]. We used the resulting model to  
172 predict  $EC_{50}$  and  $G_{\infty}$  for 33 variants with mutation combinations that are not found in the large-scale  
173 dataset – and using only a restricted set of 16 missense mutations. We chose the 16 mutations to give a  
174 range of different effects on the dose-response, and we used mutations distributed across the Lacl core  
175 domain (Fig 7, Table S1) but avoided mutations to the DNA binding domain that might disrupt  
176 interactions between Lacl and its cognate DNA operator [21]. We then synthesized the Lacl sequences  
177 for the 33 variants, measured their dose-response with cytometry, and compared the results with the  
178 predictions from the LANTERN model. Overall, the prediction accuracy of the LANTERN model was  
179 nearly as good as the accuracy of the underlying measurements, with 1.93-fold and 1.19-fold accuracy  
180 for  $EC_{50}$  and  $G_{\infty}$ , respectively (Fig 8).

181 Surprisingly, five of the 33 variants had inverted dose-response curves, and all five had the same  
182 missense mutation: V136E. In addition, two double mutants with the V136E mutation had non-  
183 monotonic dose-response: the double mutant V136E/G200C had a band-stop dose-response curve  
184 (referred to as the “reversed” phenotype in earlier literature [30-36]); and the double mutant  
185 V136E/S279T had a more complicated non-monotonic dose-response (high-low-high-low). We did not  
186 include the data for V136E/G200C or V136E/S279T in the quantitative comparison (Fig 8), because it did  
187 not match the form of the Hill equation. The single mutation V136E, applied to the wild-type  
188 background, gives a dose-response with reduced  $G_{\infty}$  but  $G_0$  and  $EC_{50}$  similar to the wild type (Fig 7).  
189 Previous work has shown that single mutations that reduce  $G_{\infty}$  relative to the wild-type can be  
190 intermediates toward the evolution of the inverted phenotype [37-39], though V136E is located more  
191 on the periphery of the protein structure than the intermediate mutations in those previous studies. The  
192 prediction accuracy for the five inverted variants was generally poor, particularly for  $EC_{50}$ . This  
193 discrepancy was not surprising: the large-scale dataset used to train the model contained few examples  
194 of inverted variants, and so the model could not learn to predict them. If we consider only the 28 non-  
195 inverted variants tested, the prediction accuracy of the LANTERN model improves significantly for  $EC_{50}$   
196 (1.31-fold) but only slightly for  $G_{\infty}$  (1.17-fold).

197 In addition to accurately predicting phenotype from genotype, LANTERN learns interpretable models  
198 [29]. Part of this interpretability comes from the way LANTERN learns to represent the effect of each  
199 mutation. LANTERN represents each mutational effect as a vector in a low dimensional latent space  
200 (three dimensions for the Lacl dataset), and the combined effect of multiple mutations is simply  
201 represented as the sum of the corresponding vectors. The different components of the latent vector  
202 space learned by a LANTERN model often resemble a set of latent biophysical parameters (e.g., free  
203 energies) that control the protein phenotype. However, the latent parameters learned by a LANTERN  
204 model are unlabeled, meaning that while a connection between the parameters learned by LANTERN  
205 and biophysical parameters may exist, the model does not identify this connection. But, when an explicit

206 biophysical model is available, it can potentially be linked to the parameters learned by LANTERN. This  
207 has been demonstrated qualitatively for a biophysical model of LacI function [40-43] and the LANTERN  
208 model trained on the large-scale LacI dataset [29]. More specifically, the first (most significant) latent  
209 parameter learned by the LANTERN model seems to correspond to changes to any one of three  
210 parameters in the biophysical model (the binding free energy for LacI to its DNA operator,  $\Delta\epsilon_{RAi}$ ; the  
211 logarithm of the LacI allosteric constant,  $\Delta\epsilon_{Ai}$ ; or the ligand binding constant for the inactive state of  
212 LacI,  $K_i$ ; using the notation of [40, 42]). The second latent parameter, however, seems to correspond to  
213 changes to a single parameter in the biophysical model (the ligand binding constant for the active state  
214 of LacI,  $K_A$ )

215 To see if this potential link between LANTERN and biophysics could be used in forward engineering, we  
216 attempted to use the LANTERN model results together with insight from the biophysical model to  
217 engineer improved inverted LacI variants. Most inverted LacI variants in the large-scale dataset have  
218 relatively high  $EC_{50}$ , and they are also somewhat leaky ( $G_\infty > 1000$  MEF, compared with  $G_0 = 158$  MEF for  
219 wild-type LacI). Based on the biophysical model, both  $EC_{50}$  and  $G_\infty$  of inverted variants can be reduced by  
220 decreasing the ligand binding constant for the active state,  $K_A$ , which tentatively corresponds to an  
221 increase in the second latent parameter of the LANTERN model. So, we chose three mutations with a  
222 significant predicted increase in that second latent parameter (S70R, V80L, and V136E). We synthesized  
223 and tested LacI variants composed of those mutations added onto the background sequences for two  
224 genetically distinct inverted variants. In both inverted backgrounds, the mutation V80L reduced  $EC_{50}$  by  
225 a factor of 5 or 6, and reduced  $G_\infty$  by a factor of about 1.3 (Fig 9, blue). The other two mutations,  
226 however, did not have the intended effect: S70R increased  $EC_{50}$  in both inverted backgrounds (Fig 9,  
227 orange), and V136E resulted in constitutively high output (Fig 9, green). Although imperfect, this initial  
228 test of linking an interpretable, data-driven ML model to a biophysical model to engineer genetic  
229 sensors shows promise for engineering difficult-to-access phenotypes that differ significantly from the  
230 wild type.

## 231 Discussion

232 We have demonstrated two approaches for precision engineering of genetic sensors and quantitatively  
233 evaluated their accuracy and the range of engineered phenotypes they can access. With *in silico*  
234 selection, we engineered sensors with  $EC_{50}$  values spanning nearly three orders of magnitude with high  
235 precision (1.3-fold). In addition, we demonstrated that *in silico* selection can be used for facile, multi-  
236 objective engineering to give genetic sensors with specified values for both  $EC_{50}$  and  $G_\infty$ , and with high  
237 accuracy relative to pre-defined specifications (1.22-fold and 1.14-fold for  $EC_{50}$  and  $G_\infty$ , respectively). We  
238 also showed that *in silico* selection can be used for multi-objective engineering of more difficult and rare  
239 phenotypes: inverted sensors with specified  $EC_{50}$ , though with lower accuracy due to the relative  
240 sparsity of inverted variants in the large-scale dataset (1.6-fold to 2.6-fold for  $EC_{50}$ ). With ML-enabled  
241 forward engineering we demonstrated that an ML model can be trained with a large-scale genotype-  
242 phenotype landscape dataset, and that model can then be used to predict the dose-response of new  
243 mutation combinations, again with good accuracy (1.3-fold to 1.9-fold for  $EC_{50}$  and  $\sim 1.2$ -fold for  $G_\infty$ ). We  
244 further demonstrated that an interpretable ML model can be used together with insight from a more  
245 explicit biophysical model to engineer inverted genetic sensors with improved  $EC_{50}$  and  $G_\infty$ . To get a  
246 baseline for comparison of the performance of the precision engineering approaches, we measured  
247 multiple replicate dose-response curves for wild-type LacI (two biological replicates, with a total of 15

248 technical replicates measured on six different days). Across those wild-type replicates, the geometric  
249 standard deviation was 1.16-fold, 1.22-fold, and 1.11-fold, for  $EC_{50}$ ,  $G_0$ , and  $G_\infty$ , respectively.

250 For both approaches to precision engineering, it is important that the large-scale dataset contains  
251 sequence variants with multiple mutations, i.e., not just data for variants with single amino acid  
252 substitutions. Similarly, the dataset must contain results specifically related to each variant in the  
253 measured library rather than just an enrichment score associated with each mutation. With *in silico*  
254 selection, if we restrict the dataset to only single-mutant variants, the expected probability for success  
255 (i.e., engineering a dose-response satisfying the specification) drops significantly (Supplementary  
256 Information). Also, there are no single-mutant variants in the dataset expected to satisfy the  
257 specifications farthest from the wild-type (inverted dose response; or  $G_\infty = 16$  kMEF and  
258  $EC_{50} = 10$   $\mu\text{mol/L}$  or  $30$   $\mu\text{mol/L}$ ; Table S2). So, with only single mutations, the range of phenotypes that  
259 can be engineered becomes more limited. Multi-mutant variants are also important for training the ML  
260 model, since multi-mutant data are required to make predictions for new mutation combinations  
261 without strong assumptions about the additivity and linearity of mutational effects [44].

262 To compare the accuracy demonstrated here with previous work, we are only able to find four examples  
263 of quantitative evaluation of predicted vs. measured genetic sensor dose-response. Two of those were  
264 for RNA-based sensors, and the other two were focused on engineering the dose-response of protein-  
265 based genetic sensors by varying the sequence of the cognate DNA operator (while using the wild-type  
266 protein sequences). Those previous publications included quantitative results for  $G_0$  and  $G_\infty$  (or the ratio  
267  $G_\infty/G_0$ ), and one included results for  $G(L)$ , but none of them included quantitative results for  $EC_{50}$ .  
268 Borujeni et al. developed a biophysical modeling approach to engineer RNA-based genetic sensors [13].  
269 They tested the accuracy of the model by measuring the response of 67 riboswitches and showed that  
270 their model could predict the activation ratio,  $G_\infty/G_0$ , with approximately 2.5-fold accuracy (i.e., within  
271 2-fold of the correct value for 55 % of the tested riboswitches). However, their model was less accurate  
272 for calculating the values of  $G_0$  and  $G_\infty$  rather than their ratio (~8-fold and ~6-fold accuracy respectively).  
273 Angenent-Mari et al. trained several deep neural network models using a large-scale genotype-  
274 phenotype dataset for RNA toehold switches [14]. Their best model was able to predict  $G_0$  and  $G_\infty$  with  
275 about 3-fold accuracy. Yu et al. developed a biophysical model to predict how changes in promoter  
276 architecture and sequence affect  $G_0$  and  $G_\infty$  [45]. Their model was able to predict  $G_0$  and  $G_\infty$  with 1.6-  
277 fold accuracy across a set of 8269 designed *lac* operators (i.e., predictions within 2-fold of the true value  
278 87% of the time). Zhou et al. used dose-response measurements for protein-based genetic sensors with  
279 2632 combinatorically designed operator sequences to train regression models for  $G(L)$  at each ligand  
280 concentration ( $L$ ). Their best model had a predictive accuracy of about 1.2-fold [46]. By comparison, in  
281 our demonstration of the *in silico* selection method, all 16 of the engineered sensors with data shown in  
282 Fig 3 had both  $EC_{50}$  and  $G_\infty$  within 2-fold of the specified target values, and two of the three inverted  
283 sensors (Fig 4) had  $EC_{50}$  within 2-fold of the target value. Also, our data-driven ML model was able to  
284 correctly predict  $EC_{50}$  and  $G_\infty$  within 2-fold for 76 % and 97 % of the tested LacI variants, respectively.

285 If we broaden our comparisons to include predictive models for constitutive gene expression, the best-  
286 known examples are probably the various models for predicting the translation initiation rate from  
287 ribosomal binding site (RBS) sequences [47-52]. In a recent evaluation of several of those models using  
288 data for nearly 10,000 RBS sequences, the models' predictive accuracy ranged from approximately 1.85-  
289 fold to 11-fold (between 23 % and 74 % predicted within 2-fold of the measured value), with the most  
290 recent iteration of the RBS calculator giving the best performance [53]. A biophysics-based model was

291 also demonstrated for terminator strength in *E. coli*, with approximately 3.9-fold accuracy across a set of  
292 582 natural and synthetic designed terminators [54]. More recently, LaFleur et al. developed a  
293 biophysical model for the strength of promoters in *E. coli* [55]. That model was able to correctly predict  
294 *in vitro* transcription rates with 1.6-fold accuracy across a set of 5388 designed promoters (i.e., within  
295 2-fold of the correct value 92 % of the time), though it was less accurate for *in vivo* systems  
296 (approximately 2-fold accuracy). Similar predictive models of promoter function have been developed  
297 for eukaryotic cells [56-59]. However, those reports only evaluated model performance using the  
298 correlation coefficient, and the data comparing predicted and measured results are not available as part  
299 of the reports' data supplements. So, it is not possible to estimate the predictive fold-accuracy of those  
300 models with the available information.

301 In summary, the precision engineering approaches described here have very good accuracy compared  
302 with previous quantitative results. The question of how accurate an engineering method would need to  
303 be will depend on specific applications. Beal et al. have estimated that a target accuracy of 1.5-fold  
304 would be sufficient for most applications requiring engineered genetic regulatory networks [27].

305 The use of interpretable ML modeling in conjunction with a biophysical model also has the potential to  
306 become a useful engineering approach, as demonstrated here for the engineering of improved inverted  
307 LacI variants. But more rigorous methods would be needed to link the latent parameters of the ML  
308 model to the biophysical parameters before that approach could be used for engineering with  
309 quantitative precision. An alternative would be to fit the large-scale dataset directly with a biophysical  
310 model, if an appropriate model is available. One outstanding problem is that estimation of biophysical  
311 parameters from phenotype measurements can be ambiguous [60, 61]. A large-scale measurement  
312 approach, with measurements of many different multi-mutation combinations could help to overcome  
313 ambiguity, since it provides information on mutational effects across many different genetic  
314 backgrounds that can help resolve those ambiguities [62]. However, that kind of approach will probably  
315 prove much more challenging for protein-based genetic sensors, where the same change to the dose-  
316 response curve can be explained by changes to several different biophysical parameters as shown by  
317 Razo-Mejia et al. [42] and demonstrated in our experience fitting the large-scale LacI dataset with a  
318 LANTERN model as discussed above.

319 For most applications, there will be some shift in context between the large-scale measurement and the  
320 application (e.g., a change in strain, growth conditions, and/or the genes that are regulated by the  
321 sensor). Ultimately, successful use of the methods described here will depend on the ability to predict  
322 how a genetic sensor's dose-response curve will change in response to those types of context shifts. The  
323 types of biophysical models discussed above, whether used in conjunction with interpretable ML or fit  
324 directly to data, provide a promising solution to the challenge of predicting function across different  
325 contexts. For example, Razo-Mejia et al. developed a biophysical model for allosteric regulation with  
326 LacI, and showed that it could accurately predict changes to the dose-response curve due to changes in  
327 LacI copy number or the interaction strength between LacI and its cognate operator [42]. Chure,  
328 Kaczmarek, and Phillips then demonstrated that the same model could accurately predict changes in the  
329 basal output level,  $G_0$ , due to cell growth at different temperatures and with different carbon  
330 sources [63]. Notably, Chure, Razo-Mejia, et al. showed that the model could also be used to predict  
331 changes in dose-response resulting from combinations of mutations (using single-mutant data) [40].  
332 Although they did not include a quantitative evaluation of the accuracy of those predictions, it appears  
333 to be quite good (e.g., six of six predicted  $EC_{50}$  within 2-fold of the correct value, based on a visual



334 inspection of Fig. 5A in [40]). Sochor showed that a similar biophysical model could be used to predict  
335 the *in vivo* dose-response curve of LacI using data from *in vitro* transcription measurements [64]. Finally,  
336 the model developed by LaFleur et al. [55] can predict changes in gene expression due to changes in  
337 sequence context upstream and downstream of a promoter site. So, although quantitative prediction of  
338 the effects of different biological contexts remains one of the outstanding challenges in the field [65],  
339 for genetic sensors at least, promising solutions exist. Admittedly, if biophysical models (or other means)  
340 are needed to correct for shifts in context between the large-scale measurement and the application,  
341 that will add an additional layer of uncertainty in the use of the methods described here. But that just  
342 highlights the need for the best possible quantitative accuracy of the underlying large-scale  
343 measurements.

344 Currently, we are aware of only one large-scale dataset with quantitative results for the dose-response  
345 curves of a protein-based genetic sensor: the LacI dataset used here [28]. So, it is not yet possible to  
346 fully assess the generalizability of the methods presented here to other proteins. As an indication of the  
347 possible generalizability, though, we can compare the basic requirements of our methods with the  
348 requirements for directed evolution: both rely on the ability to generate phenotypic diversity via protein  
349 mutations. Directed evolution and related methods have been used to qualitatively improve a large  
350 variety of protein-based genetic sensors [17-26], in some cases with a single round of mutagenesis and a  
351 library diversity comparable to number of variants in the LacI dataset ( $10^4$  to  $10^5$  variants) [19-21, 26].  
352 Furthermore, in an approach similar to the *in silico* selection method described here, Ogawa et al. used  
353 deep mutational scanning data for a library of single-mutant XylS variants to identify mutations that  
354 alter the ligand specific of that protein-based genetic sensor [66]. So, as large-scale genotype-phenotype  
355 measurements become more accessible, we expect that the type of precision engineering approaches  
356 described here could be readily generalized to engineer different types of genetic sensors or other  
357 complex biological functions.

358 Compared with our approach, directed evolution has the advantage that it can be implemented with  
359 very large libraries of sensor protein variants: as many as  $10^8$ , compared with  $\sim 10^5$  for the LacI dataset  
360 used here. So, we think that directed evolution methods will remain important for engineering new,  
361 hard-to-access protein functions, such as sensitivity to new ligands [6, 10, 67]. However, it would be very  
362 difficult to implement a directed evolution method for precision sensor engineering, for example to give  
363 a quantitatively specified  $EC_{50}$ . Similarly, promising new methods have been demonstrated for *de novo*  
364 computational design of genetic sensors [68], but those methods are unlikely to provide quantitative  
365 precision on their own. Therefore, we expect that methods like those described here will ultimately be  
366 used in conjunction with directed evolution or computational design, to provide quantitative precision  
367 when that is needed for real-world applications.

## 368 Materials and Methods

### 369 Large-scale dataset

370 The large-scale dataset for LacI dose-response curves is described in ref[28]. It includes the estimated  
371 Hill equation parameters,  $EC_{50}$ ,  $G_0$  and  $G_{\infty}$ , for over 60,000 variants of the LacI genetic sensor, measured  
372 in *E. coli*. Those Hill equation parameter estimates, and their associated uncertainties, were obtained by  
373 fitting the measured dose-response curve of every variant to the Hill equation. That dataset is available  
374 via the NIST Science Data Portal, with the identifier ark:/88434/mds2-2259

375 (<https://data.nist.gov/od/id/mds2-2259> or <https://doi.org/10.18434/M32259>). Here, we used the Hill  
376 equation parameter estimates and uncertainties as they are reported in that dataset.

### 377 *In silico* selection

378 For the *in silico* selection results shown in Fig. 3, *lacI* variants were chosen from the large-scale dataset  
379 based on the following criteria:

- 380 1.  $EC_{50}$  within 1.2-fold of the target value (after correcting for systematic errors, see Fig. 2C)
- 381 2.  $G_{\infty}$  within 1.1-fold of the target value
- 382 3.  $G_0 < 2$  kMEF

383 Those criteria were first applied using the median values reported in the dataset for  $G_0$ ,  $G_{\infty}$ , and  $EC_{50}$ .  
384 That resulted in multiple *lacI* variants for each specification (between 18 and 1513). To identify the best  
385 variants to synthesize and test, the uncertainty information reported in the dataset was then used to  
386 estimate the probability for success of each variant: more specifically, the posterior samples reported in  
387 the dataset (from Bayesian estimation of the Hill equation parameters) were used to calculate the  
388 probability that each variant would meet the listed criteria. The variants were then ranked based on  
389 their probability of success; and the highest ranking three variants were selected for testing.

390 For the *in silico* selection results shown in Fig. 4, a similar procedure was used to choose *lacI* variants,  
391 with the following criteria:

- 392 1.  $EC_{50}$  within 1.5-fold of the target value
- 393 2.  $G_{\infty} < 12.5$  kMEF
- 394 3.  $19.2$  kMEF  $< G_0 < 32.5$  kMEF

395 When applied to the median values for  $G_0$ ,  $G_{\infty}$ , and  $EC_{50}$ , those criteria were only met by one or two *lacI*  
396 variants for each specification. Also, the calculated probability to meet the listed criteria was greater  
397 than 10% for only one variant per specification. So, only a single variant was selected for each  
398 specification.

### 399 Strains, plasmids, and culture conditions

400 All reported measurements were completed using *E. coli* strain MG1655 $\Delta lac$  [69], in which the lactose  
401 operon of *E. coli* strain MG1655 (ATCC #47076) was replaced with the bleomycin resistance gene from  
402 *Streptoalloteichus hindustanus* (*Shble*).

403 Dose-response curves were measured with flow cytometry using *E. coli* MG1655 $\Delta lac$  transformed with  
404 variants of the pVER plasmid, described previously [28]. The plasmid contained different variants of the  
405 *lacI* coding DNA sequence (CDS), as described in the text, and an expression cassette with enhanced  
406 yellow fluorescent protein (eYFP) under the control of the lactose operator (*lacO*). The *lacI* CDS was  
407 verified with Sanger sequencing for each variant.

408 All cultures were grown in a rich M9 media (3 g/L  $KH_2PO_4$ , 6.78 g/L  $Na_2HPO_4$ , 0.5 g/L NaCl, 1 g/L  $NH_4Cl$ ,  
409 0.1 mmol/L  $CaCl_2$ , 2 mmol/L  $MgSO_4$ , 4 % glycerol, and 20 g/L casamino acids) supplemented with  
410 50  $\mu g/mL$  kanamycin.

411 For flow cytometry measurements, *E. coli* cultures were grown in a laboratory automation system that  
412 included an automated liquid handler (Hamilton, STAR), an automated plate sealer (4titude, a4S), an  
413 automated de-sealer (Brooks, XPeel), and two multi-mode plate readers (BioTek, Neo2SM).

414 Cultures were grown in clear polystyrene 96-well plates with 1.1 mL square wells (4titude, 4ti-0255). The  
415 culture volume per well was 0.5 mL. Before incubation, each 96-well growth plate was sealed by the  
416 automated plate sealer with a gas permeable membrane (4titude, 4ti-0598). Growth plates were  
417 incubated in one of the multi-mode plate readers at 37 °C with a 1 °C gradient applied from the bottom  
418 to the top of the incubation chamber to minimize condensation on the inside of the membrane. The  
419 plate readers were set for double-orbital shaking at 807 cycles per minute. Optical density at 600 nm  
420 (OD600) was measured every 5 minutes during incubation, with continuous shaking applied between  
421 measurements (optical density at 700 nm and YFP fluorescence were also measured every 5 minutes).  
422 After incubation, the automated de-sealer was used to remove the gas-permeable membrane from each  
423 96-well plate to enable automated passaging of cultures and sample preparation for flow cytometry  
424 measurements.

425 For each measurement, starter cultures were prepared from glycerol freezer stock in 5 mL of rich M9  
426 media in a 14 mL snap-cap culture tubes. Starter cultures were incubated at 37 °C with orbital shaking at  
427 300 rpm for between 4 h and 24 h prior to loading the automation system. The automation system then  
428 prepared 96-well growth plates, sealed and de-sealed the growth plates, incubated the growth plates,  
429 and prepared flow cytometry sample plates. The automated culture protocol consisted of the following  
430 steps:

- 431 1. Prepare first growth plate, with 450  $\mu$ L rich M9 media in each well.
- 432 2. Pipette 50  $\mu$ L of starter culture into each well in rows B-G of the plate (leaving rows A and H  
433 blank).
  - 434 a. Use a *E. coli* containing a different *lacI* variant for each row.
- 435 3. Seal first growth plate with gas permeable membrane.
- 436 4. Incubate plate in plate reader for 12 h to 14 h.
  - 437 a. Grow to stationary to provide a reproducible starting point for each measurement.
- 438 5. Prepare second growth plate with 490  $\mu$ L in each well.
  - 439 a. Dilution series of isopropyl- $\beta$ -D-thiogalactopyranoside (IPTG): 11 columns of a 2-fold  
440 serial dilution gradient and one column with zero IPTG.
- 441 6. Ten minutes before the end of the incubation cycle for the first growth plate, move the second  
442 growth plate to a heated station set to 47 °C.
  - 443 a. Ten minutes at 47 °C will pre-warm the media in the plate to 37 °C.
- 444 7. De-seal the first growth plate (after completion of the stationary-phase incubation cycle).
- 445 8. Pipette 10  $\mu$ L from each well in the first growth plate to the corresponding well in the second  
446 growth plate.
  - 447 a. 50-fold dilution; using a 96-channel pipetting head.
- 448 9. Seal second growth plate with gas permeable membrane.
- 449 10. Incubate second growth plate in plate reader for 160 minutes.
  - 450 a. Sufficient for approximately 10-fold increase in cell density or 3.3 doublings.
- 451 11. Prepare third growth plate with 450  $\mu$ L in each well.
  - 452 a. Same dilution series as in second growth plate.
- 453 12. Ten minutes before the end of the incubation cycle for the second growth plate, move the third  
454 growth plate to a heated station set to 47 °C.
- 455 13. De-seal the second growth plate (after completion of the 160 minute incubation cycle).

- 456 14. Pipette 50  $\mu\text{L}$  from each well in the second growth plate to the corresponding well in the third  
457 growth plate.
- 458 a. 10-fold dilution; using a 96-channel pipetting head.
- 459 15. Seal third growth plate with gas permeable membrane.
- 460 16. Incubate third growth plate in plate reader for 160 minutes.
- 461 17. Prepare flow cytometry sample plate (round-bottom 96-well plate, Falcon, 351177).
- 462 a. Each well in rows B-G: 195  $\mu\text{L}$  1x PBS with 170  $\mu\text{g}/\text{mL}$  chloramphenicol (Fisher  
463 BioReagents, cat. #BP904-100).
- 464 b. Rows A and H: PBS blanks, focusing fluid blanks, and space for calibration bead sample
- 465 18. At the end of the incubation cycle for the third growth plate, pipette 5  $\mu\text{L}$  from each well to the  
466 corresponding well in the flow cytometry sample plate.

467 At the end of the automated culture protocol, the flow cytometry sample plate was transferred to the  
468 flow cytometry autosampler for measurement.

### 469 Flow cytometry

470 Flow cytometry samples were measured with an Attune NxT flow cytometer equipped with a 96-well  
471 plate autosampler using a 488 nm excitation laser and a 530 nm  $\pm$  15 nm bandpass emission filter. Blank  
472 samples were measured with each batch of cell measurements, and an automated gating algorithm was  
473 used to discriminate cell events from non-cell events [70]. Fluorescence calibration beads (Spherotech,  
474 part no. RCP-30-20A) were also measured with each batch of samples to facilitate calibration of flow  
475 cytometry data to molecules of equivalent fluorescein (MEF) [71-73].

476 For each *Lacl* variant, the dose-response curve was taken to be the geometric mean fluorescence from  
477 flow cytometry as a function of the IPTG concentration in the media of the third growth plate. For many  
478 variants, data from multiple measurements were used, e.g., from biological or technical replicates, or  
479 data across multiple, overlapping IPTG dilution series to extend the range of inducer concentrations. For  
480 some biological and/or technical replicates, the cytometry results differed significantly from the  
481 consensus results from other replicates (i.e.,  $G_\infty$  more than 1.25-fold different from the consensus  
482 value). Data for those outlier replicates were not used. The Hill equation parameters and their  
483 associated uncertainties were determined by fitting all of the non-outlier cytometry data for each  
484 variant to the Hill equation using Bayesian parameter estimation by Markov Chain Monte Carlo (MCMC)  
485 sampling with PyStan [74].

### 486 LANTERN ML modeling

487 LANTERN was fit to the *Lacl* dataset with methods described in Ref[29]. In this model, LANTERN learns to  
488 predict observed phenotypes  $y \in R^D$  given a one-hot encoded form of the genotype  $x \in \{0, 1\}^p$  in two  
489 key steps. First, the genotype is projected to a low dimensional space  $z = Wx$ , where  $W \in R^{K \times p}$  and  
490  $K \ll p$ . Second, LANTERN learns a smooth non-linear surface connecting this low dimensional space to  
491 observed phenotypes:  $y = f(z)$ . Both the matrix  $W$  and function  $f(z)$  are unknown parameters and are  
492 learned by LANTERN in the form of an approximate variational posterior [75].

493 To quantify the predictive uncertainty of the LANTERN model for individual variants, we approximated  
494 the posterior predictive distribution for each variant under the learned model. This was done by taking  
495 Monte Carlo draws from learned approximate posterior (fifty draws were taken for each variant). Then,

496 the mean and standard deviation of these draws were used to summarize the posterior predictive  
497 interval, as shown in Fig 8.

498

## 499 Acknowledgments

500 We would like to thank Elizabeth Strychalski, Samuel Schaffter, and Edward Eisenstein for thoughtful  
501 comments on the manuscript. S.F.L. is supported by NIH grants R01 HG011676 and R01 AI164530.

## 502 Author Contributions

503 D.S.T., P.D.T., and D.R. designed the experiment.

504 D.S.T, S.L., and D.R. developed the experimental workflow.

505 E.F.R., and D.R. programmed automated protocols.

506 D.S.T., N.A., O.V., and D.R. performed flow cytometry experiments.

507 P.D.T. performed the machine learning analysis and predictions.

508 D.S.T. and D.R. wrote the manuscript.

509 All authors contributed to the manuscript.

## 510 Conflict of Interest

511 The authors declare that they have no conflict of interest. Certain commercial equipment, instruments,  
512 or materials are identified to adequately specify experimental procedures. Such identification neither  
513 implies recommendation nor endorsement by the National Institute of Standards and Technology nor  
514 that the equipment, instruments, or materials identified are necessarily the best for the purpose.

515 **Figures**

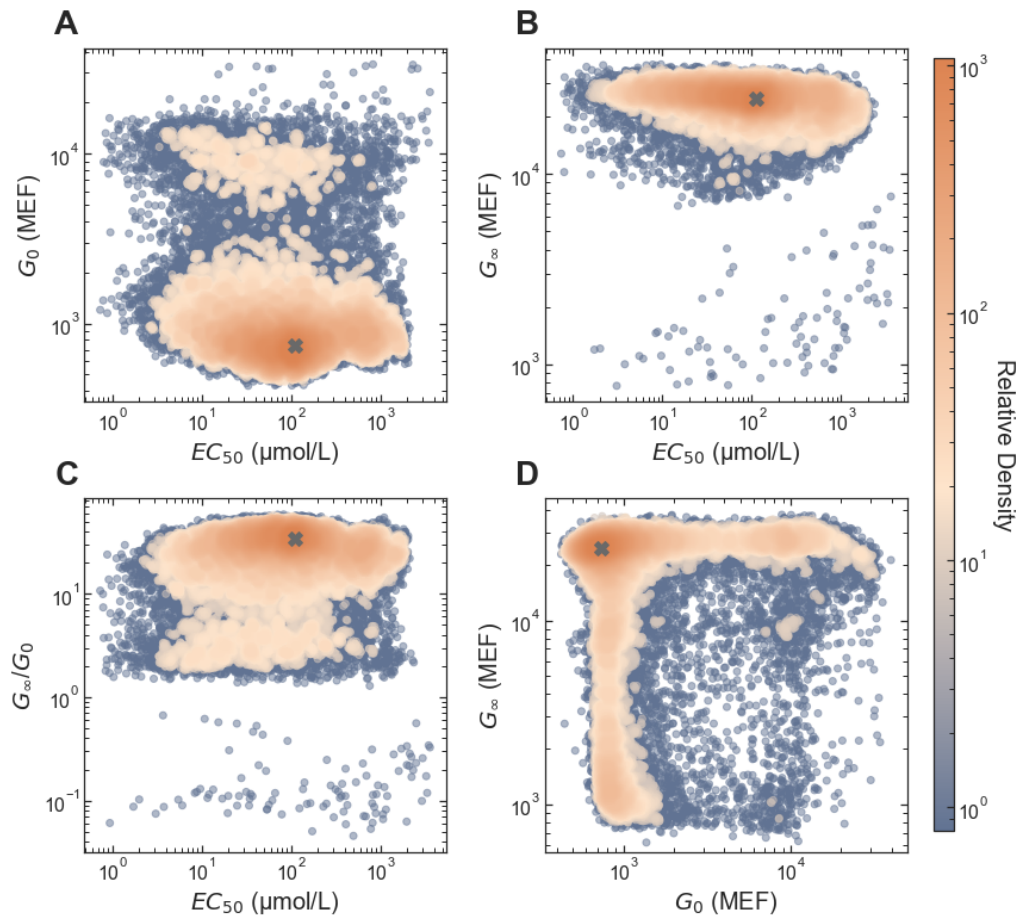

516

517 **Figure 1. Diversity of dose-response phenotypes in the large-scale dataset.** The colored points are the  
518 values as reported in the genotype-phenotype dataset, with colors indicating the relative density of  
519 similar phenotypes. The gray 'X' in each plot shows the parameter values for the wild-type LacI dose-  
520 response curve.

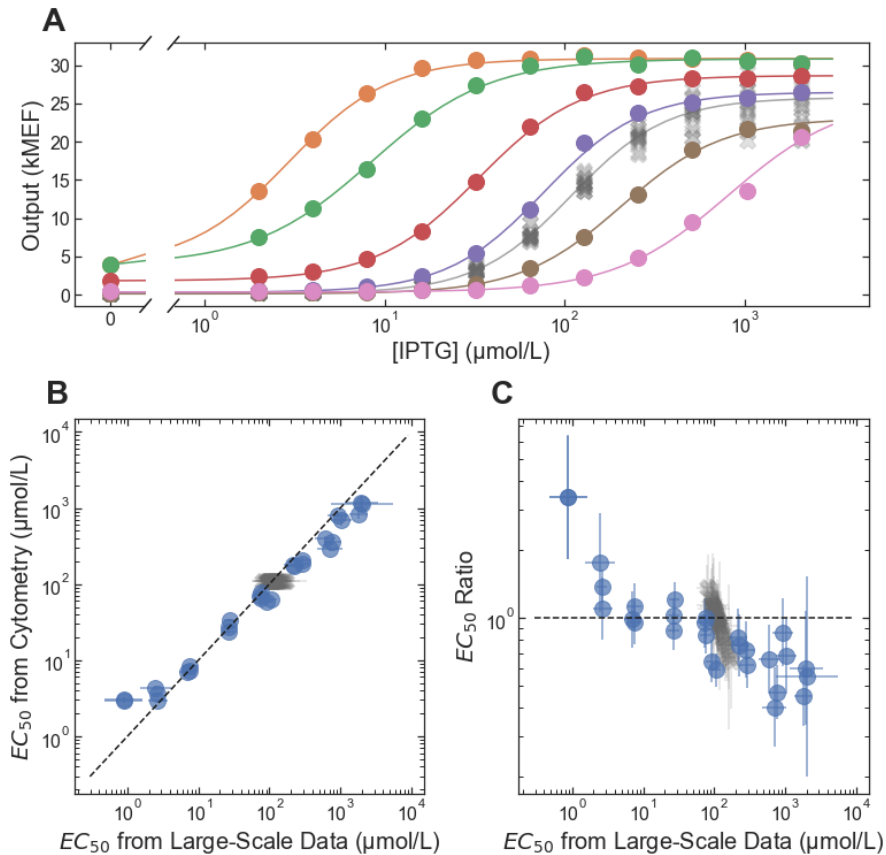

521

522 **Figure 2. Accuracy and precision of  $EC_{50}$  from *in silico* selection.** (A) Example dose-response curves for  
523 LacI variants selected to span a wide range of  $EC_{50}$  values. Each variant is plotted with a different color,  
524 with lines showing the fits to the dose-response using the Hill equation. The wild-type dose response is  
525 plotted with the gray 'X' markers. (B)  $EC_{50}$  from the flow cytometry measurements plotted vs.  $EC_{50}$  from  
526 the large-scale dataset. The dashed line indicates equality between the cytometry and large-scale  
527 results. (C) The ratio:  $(EC_{50}$  from flow cytometry)  $\div$  ( $EC_{50}$  from the large-scale dataset) plotted vs.  $EC_{50}$   
528 from the large-scale dataset. In both B and C, results for non-wild-type LacI variants are plotted with  
529 blue circles, and results for wild-type LacI are plotted with gray X's (there were multiple copies of the  
530 wild-type in the large-scale dataset, each plotted separately). Error bars indicate  $\pm$  one standard  
531 deviation.

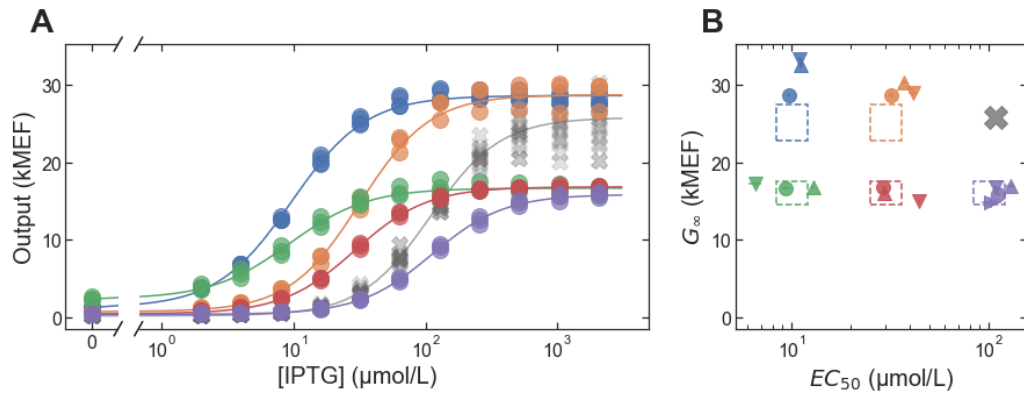

532

533 **Figure 3. Multi-objective *in silico* selection of LacI variants with different  $EC_{50}$  and  $G_{\infty}$  values.**

534 (A) Example dose-response curves for LacI variants selected to satisfy multi-objective specifications for  
 535  $EC_{50}$  and  $G_{\infty}$ . One variant is plotted for each target specification, each with a different color and with  
 536 lines showing the fits to the dose-response using the Hill equation. The wild-type dose response is  
 537 plotted with the gray 'X' markers. (B) Evaluation of multi-objective selection performance. The dashed  
 538 rectangles show the target specifications in a 2D plot of  $G_{\infty}$  vs.  $EC_{50}$ , with a different color for each  
 539 specification. For each specification, three or four distinct LacI variants were selected, and the resulting  
 540  $G_{\infty}$  and  $EC_{50}$  values (from cytometry) for those variants are plotted with different markers (with marker  
 541 color indicating the targeted specification). Error bars indicate  $\pm$  one standard deviation and are typically  
 542 smaller than the markers.

543

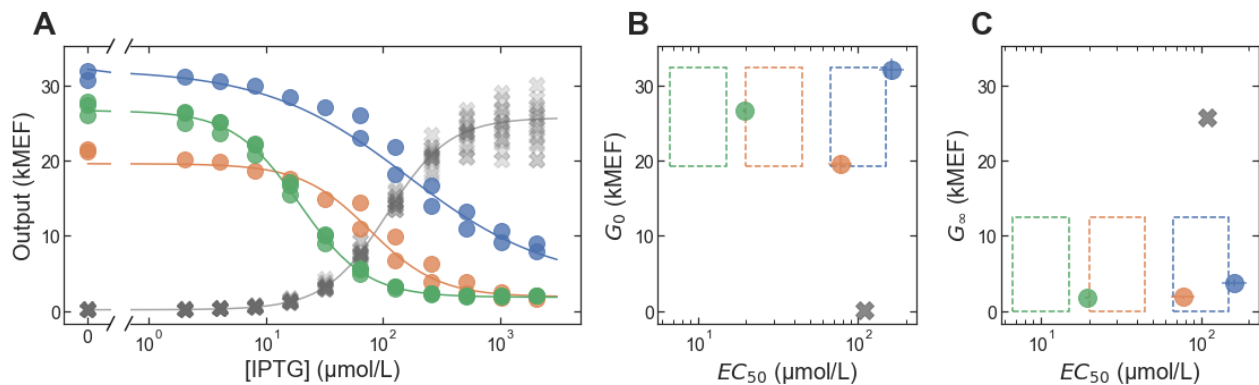

544

545 **Figure 4. Multi-objective *in silico* selection of inverted LacI variants.** (A) Dose-response curves for LacI  
 546 variants selected to have inverted dose-response curves with specified  $EC_{50}$ . One variant is plotted for  
 547 each target specification, each with a different color and with lines showing the fits to the dose-  
 548 response using the Hill equation. The wild-type dose response is plotted with the gray 'X' markers.  
 549 (B-C) Evaluation of multi-objective selection performance. The dashed rectangles show the target  
 550 specifications in a 2D plot of  $G_0$  (B) and  $G_{\infty}$  (C) vs.  $EC_{50}$ , each with a different color. For each specification,  
 551 one LacI variant was selected, and the resulting  $G_0$ ,  $G_{\infty}$  and  $EC_{50}$  values (from cytometry) for those  
 552 variants are plotted (with marker color indicating the targeted specification). For comparison, the wild-  
 553 type  $G_0$ ,  $G_{\infty}$  and  $EC_{50}$  are plotted with gray 'X' markers. Error bars indicate  $\pm$  one standard deviation and  
 554 are typically smaller than the markers.



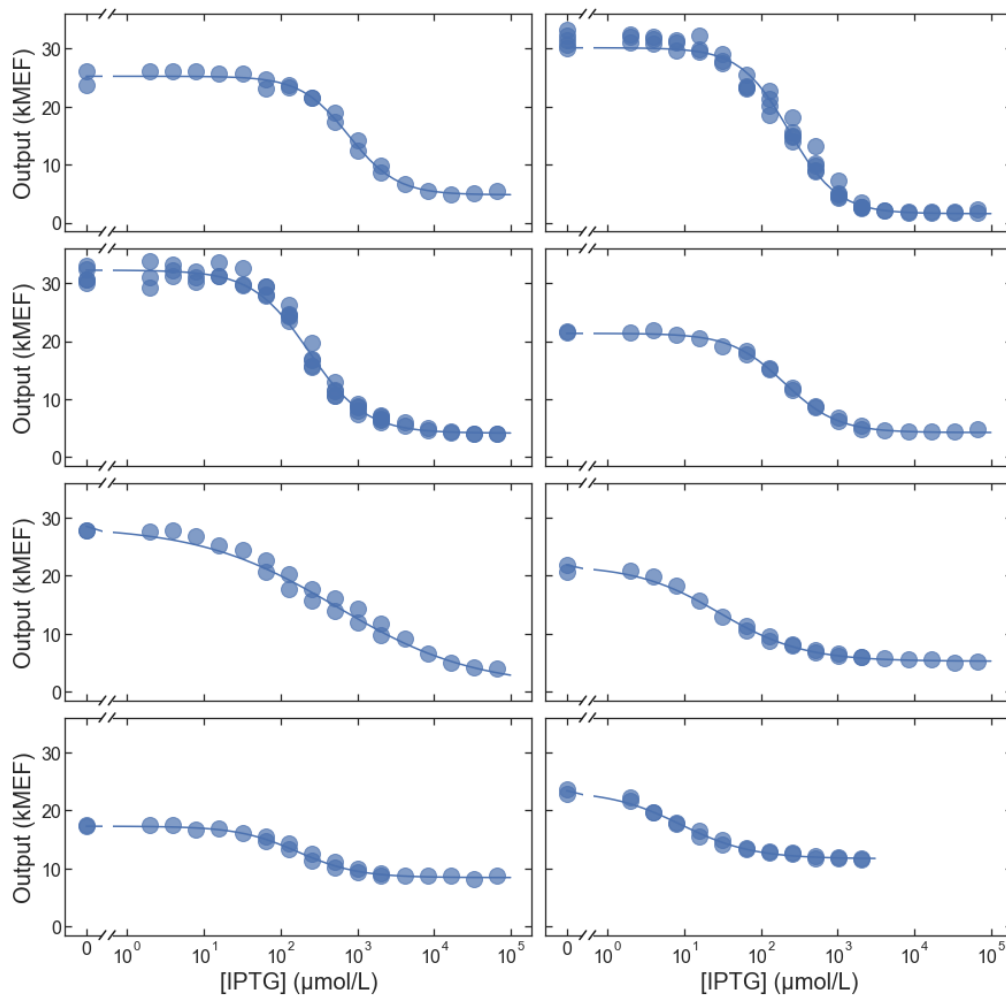

555

556 **Figure 5. Additional inverted variants.** Dose-response curves for eight additional inverted LacI variants  
557 selected to test the accuracy of the large-scale measurements.

558

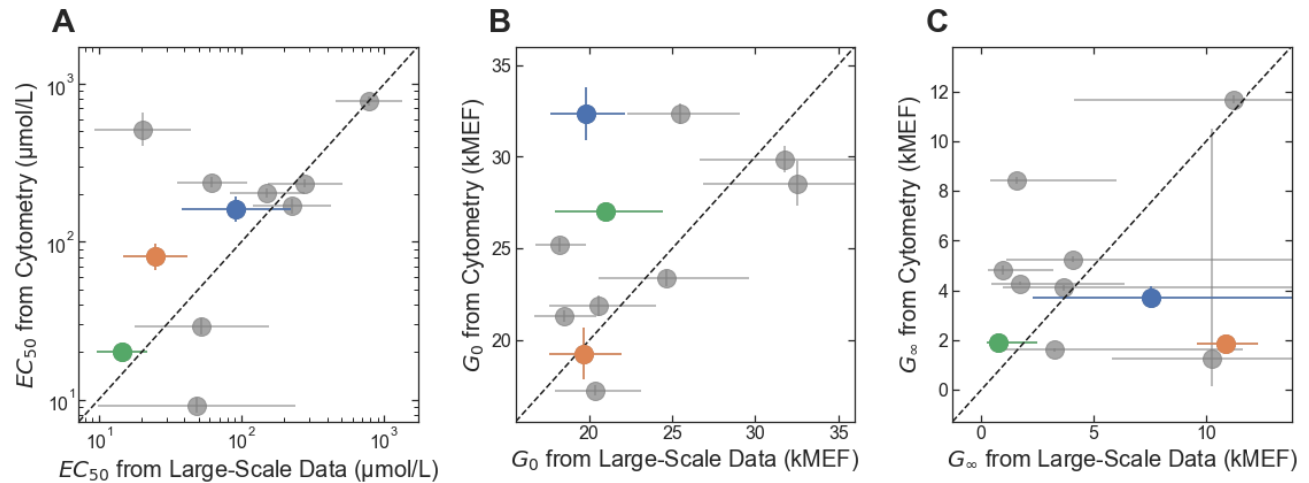

559

560 **Figure 6. Accuracy of large-scale measurement for inverted variants.** (A)  $EC_{50}$  from the flow cytometry  
561 measurements plotted vs.  $EC_{50}$  from the large-scale dataset. (B)  $G_0$  from the flow cytometry  
562 measurements plotted vs.  $G_0$  from the large-scale dataset. (C)  $G_\infty$  from the flow cytometry  
563 measurements plotted vs.  $G_\infty$  from the large-scale dataset. In all three plots, results for the inverted  
564 variants selected to have specified  $EC_{50}$  are plotted with markers colored to match the results in Fig. 4;  
565 results for additional inverted variants are plotted with gray markers. Error bars indicate  $\pm$  one standard  
566 deviation.

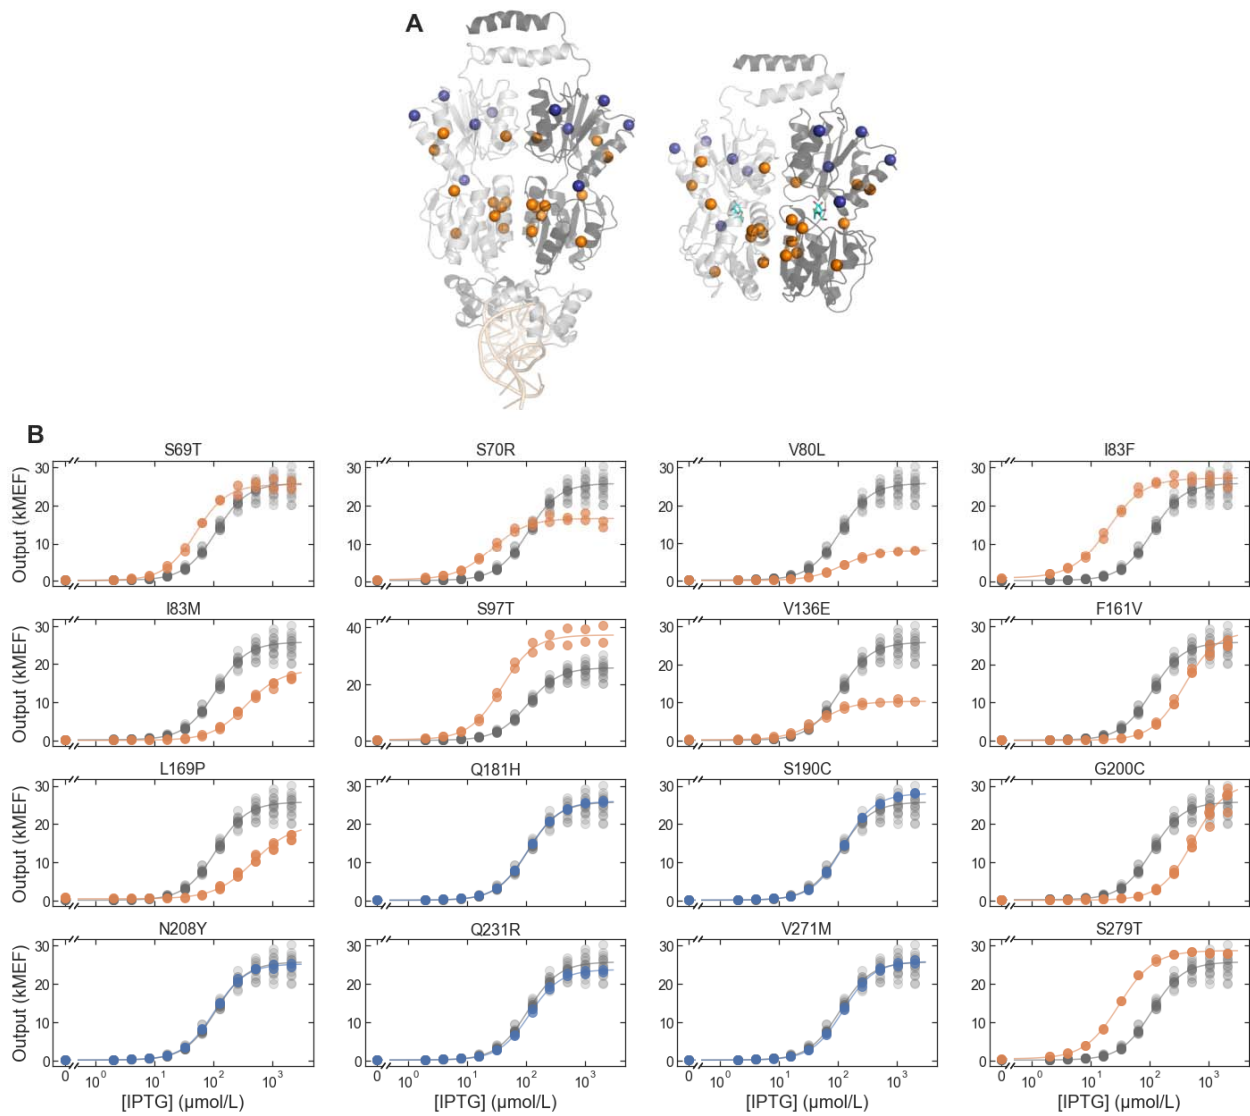

567

568 **Figure 7. Mutations used for ML-enabled forward engineering.** (A) LacI protein structure showing  
569 location of mutations. The DNA-binding configuration is shown on the left (DNA at the bottom of the  
570 structure in light orange, PDB ID: 1LBG [76]) and the ligand-binding configuration is shown on the right  
571 (IPTG in cyan, PDB ID: 1LBH [76]). Both configurations are shown with the view oriented along the  
572 protein dimer interface, with one monomer in light gray and the other monomer in dark gray. Colored  
573 spheres highlight the positions of mutations used for ML-enabled forward engineering, with silent  
574 mutations in blue and non-silent mutations in orange. (B) Dose-response of single-mutant LacI variants  
575 with each of the mutations used for ML-enabled forward engineering. In each plot, the single-mutant  
576 dose-response is plotted in blue (for silent mutations) or orange (for non-silent mutations), and the wild-  
577 type dose response is plotted in gray.

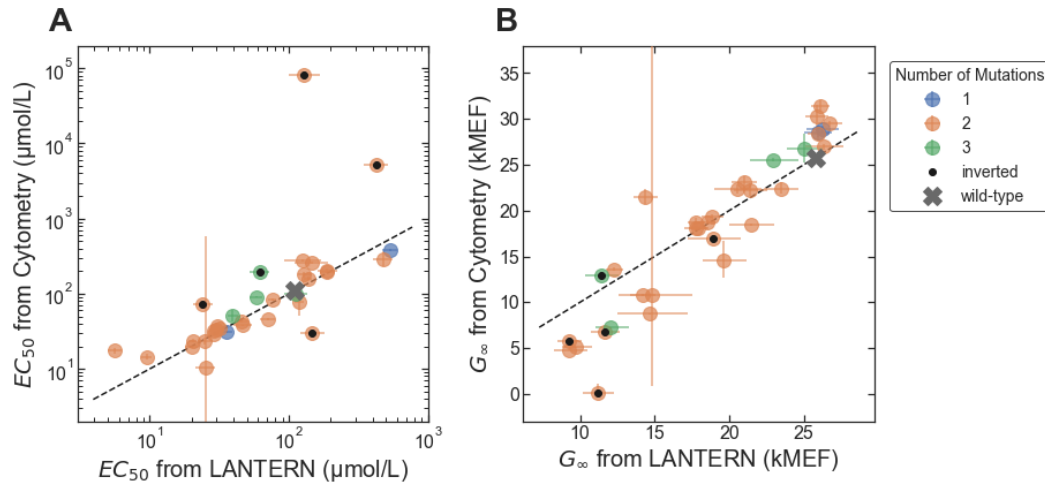

578

579 **Figure 8. Accuracy of ML-enabled forward engineering.** (A)  $EC_{50}$  from the flow cytometry  
580 measurements plotted vs.  $EC_{50}$  predicted by the LANTERN ML model. (B)  $G_{\infty}$  from the flow cytometry  
581 measurements plotted vs.  $G_{\infty}$  predicted by the LANTERN ML model. In each plot, results for Lacl variants  
582 with different numbers of mutations are plotted with different colors. Results for the five unexpectedly  
583 inverted variants are marked with black dots. Error bars indicate  $\pm$  one standard deviation.

584

585

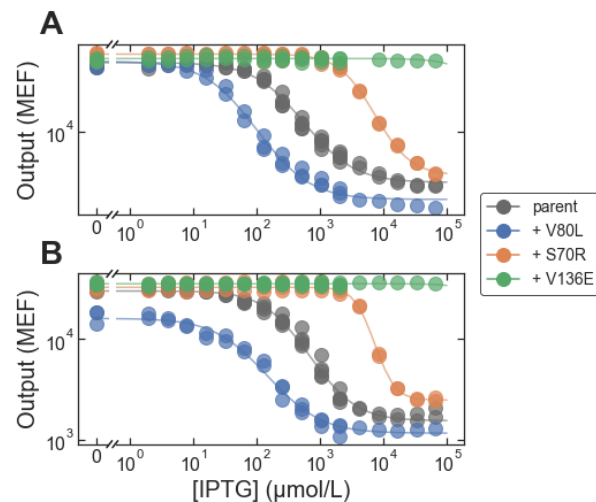

586

587 **Figure 9. Forward engineering to improve inverted sensors.** Each plot shows dose-response curves for a  
588 'parent' inverted Lacl variant and for that parent with the addition of mutations chosen to improve the  
589 inverted variant (by reducing  $EC_{50}$  and  $G_{\infty}$ ). (A) The parent variant has three missense mutations: A87P,  
590 V301M, and E357G. (B) The parent variant has five missense mutations: V96E, T154I, S158R, V238D,  
591 M254I, and V264I.

## 592 References

- 593 1. Shi S, Ang EL, Zhao H. In vivo biosensors: mechanisms, development, and applications. *Journal of*  
594 *Industrial Microbiology and Biotechnology*. 2018;45(7):491-516. doi: 10.1007/s10295-018-2004-x.
- 595 2. De Paepe B, Peters G, Coussement P, Maertens J, De Mey M. Tailor-made transcriptional  
596 biosensors for optimizing microbial cell factories. *Journal of Industrial Microbiology & Biotechnology*.  
597 2017;44(4):623-45. doi: 10.1007/s10295-016-1862-3.
- 598 3. Dykstra PB, Kaplan M, Smolke CD. Engineering synthetic RNA devices for cell control. *Nature*  
599 *Reviews Genetics*. 2022;23(4):215-28. doi: 10.1038/s41576-021-00436-7.
- 600 4. Liu D, Evans T, Zhang F. Applications and advances of metabolite biosensors for metabolic  
601 engineering. *Metabolic Engineering*. 2015;31:35-43. doi: <https://doi.org/10.1016/j.ymben.2015.06.008>.
- 602 5. Koch M, Pandi A, Borkowski O, Batista AC, Faulon J-L. Custom-made transcriptional biosensors  
603 for metabolic engineering. *Current Opinion in Biotechnology*. 2019;59:78-84. doi:  
604 <https://doi.org/10.1016/j.copbio.2019.02.016>.
- 605 6. Galvão TC, de Lorenzo V. Transcriptional regulators à la carte: engineering new effector  
606 specificities in bacterial regulatory proteins. *Current Opinion in Biotechnology*. 2006;17(1):34-42. doi:  
607 <https://doi.org/10.1016/j.copbio.2005.12.002>.
- 608 7. Mannan AA, Liu D, Zhang F, Oyarzún DA. Fundamental Design Principles for Transcription-  
609 Factor-Based Metabolite Biosensors. *ACS Synthetic Biology*. 2017;6(10):1851-9. doi:  
610 10.1021/acssynbio.7b00172.
- 611 8. Ang J, Harris E, Hussey BJ, Kil R, McMillen DR. Tuning Response Curves for Synthetic Biology. *ACS*  
612 *Synthetic Biology*. 2013;2(10):547-67. doi: 10.1021/sb4000564.
- 613 9. Verma BK, Mannan AA, Zhang F, Oyarzún DA. Trade-Offs in Biosensor Optimization for Dynamic  
614 Pathway Engineering. *ACS Synthetic Biology*. 2022;11(1):228-40. doi: 10.1021/acssynbio.1c00391.
- 615 10. Zhang J, Pang Q, Wang Q, Qi Q, Wang Q. Modular tuning engineering and versatile applications  
616 of genetically encoded biosensors. *Critical Reviews in Biotechnology*. 2021:1-18. doi:  
617 10.1080/07388551.2021.1982858.
- 618 11. Ozdemir T, Fedorec AJH, Danino T, Barnes CP. Synthetic Biology and Engineered Live  
619 Biotherapeutics: Toward Increasing System Complexity. *Cell Systems*. 2018;7(1):5-16. doi:  
620 <https://doi.org/10.1016/j.cels.2018.06.008>.
- 621 12. Lim HG, Jang S, Jang S, Seo SW, Jung GY. Design and optimization of genetically encoded  
622 biosensors for high-throughput screening of chemicals. *Current Opinion in Biotechnology*. 2018;54:18-  
623 25. doi: <https://doi.org/10.1016/j.copbio.2018.01.011>.
- 624 13. Borujeni AE, Mishler DM, Wang J, Huso W, Salis HM. Automated physics-based design of  
625 synthetic riboswitches from diverse RNA aptamers. *Nucleic Acids Research*. 2016;44(1):1-13. doi:  
626 10.1093/nar/gkv1289.
- 627 14. Angenent-Mari NM, Garruss AS, Soenksen LR, Church G, Collins JJ. A deep learning approach to  
628 programmable RNA switches. *Nature Communications*. 2020;11(1):5057. doi: 10.1038/s41467-020-  
629 18677-1.
- 630 15. Brophy JAN, Voigt CA. Principles of genetic circuit design. *Nature Methods*. 2014;11(5):508-20.  
631 doi: 10.1038/nmeth.2926.
- 632 16. De Paepe B, Maertens J, Vanholme B, De Mey M. Modularization and Response Curve  
633 Engineering of a Naringenin-Responsive Transcriptional Biosensor. *ACS Synthetic Biology*.  
634 2018;7(5):1303-14. doi: 10.1021/acssynbio.7b00419.
- 635 17. Meyer AJ, Segall-Shapiro TH, Glassey E, Zhang J, Voigt CA. *Escherichia coli* "Marionette" strains  
636 with 12 highly optimized small-molecule sensors. *Nature Chemical Biology*. 2019;15(2):196-204. doi:  
637 10.1038/s41589-018-0168-3.

- 638 18. Satya Lakshmi O, Rao NM. Evolving Lac repressor for enhanced inducibility. *Protein Engineering,*  
639 *Design and Selection.* 2008;22(2):53-8. doi: 10.1093/protein/gzn069.
- 640 19. Saeki K, Tominaga M, Kawai-Noma S, Saito K, Umeno D. Rapid Diversification of BetI-Based  
641 Transcriptional Switches for the Control of Biosynthetic Pathways and Genetic Circuits. *ACS Synthetic*  
642 *Biology.* 2016;5(11):1201-10. doi: 10.1021/acssynbio.5b00230.
- 643 20. Chong H, Ching CB. Development of Colorimetric-Based Whole-Cell Biosensor for  
644 Organophosphorus Compounds by Engineering Transcription Regulator DmpR. *ACS Synthetic Biology.*  
645 2016;5(11):1290-8. doi: 10.1021/acssynbio.6b00061.
- 646 21. Snoek T, Chaberski EK, Ambri F, Kol S, Bjørn SP, Pang B, et al. Evolution-guided engineering of  
647 small-molecule biosensors. *Nucleic Acids Research.* 2020;48(1):e3-e. doi: 10.1093/nar/gkz954.
- 648 22. Miller CA, Ho JML, Bennett MR. Strategies for Improving Small-Molecule Biosensors in Bacteria.  
649 *Biosensors.* 2022;12(2):64. PubMed PMID: doi:10.3390/bios12020064.
- 650 23. Spisak S, Ostermeier M. Engineered protein switches for exogenous control of gene expression.  
651 *Biochemical Society Transactions.* 2020;48(5):2205-12. doi: 10.1042/bst20200441.
- 652 24. Lee Sung K, Chou Howard H, Pfleger Brian F, Newman Jack D, Yoshikuni Y, Keasling Jay D.  
653 Directed Evolution of AraC for Improved Compatibility of Arabinose- and Lactose-Inducible Promoters.  
654 *Appl Environ Microb.* 2007;73(18):5711-5. doi: 10.1128/AEM.00791-07.
- 655 25. Tashiro Y, Kimura Y, Furubayashi M, Tanaka A, Terakubo K, Saito K, et al. Directed evolution of  
656 the autoinducer selectivity of *Vibrio fischeri* LuxR. *The Journal of General and Applied Microbiology.*  
657 2016;62(5):240-7. doi: 10.2323/jgam.2016.04.005.
- 658 26. Ike K, Arasawa Y, Koizumi S, Mihashi S, Kawai-Noma S, Saito K, et al. Evolutionary Design of  
659 Choline-Inducible and -Repressible T7-Based Induction Systems. *ACS Synthetic Biology.* 2015;4(12):1352-  
660 60. doi: 10.1021/acssynbio.5b00107.
- 661 27. Beal J, Teague B, Sexton JT, Castillo-Hair S, DeLateur NA, Samineni M, et al. Meeting  
662 Measurement Precision Requirements for Effective Engineering of Genetic Regulatory Networks. *ACS*  
663 *Synthetic Biology.* 2022;11(3):1196-207. doi: 10.1021/acssynbio.1c00488.
- 664 28. Tack DS, Tonner PD, Pressman A, Olson ND, Levy SF, Romantseva EF, et al. The genotype-  
665 phenotype landscape of an allosteric protein. *Molecular Systems Biology.* 2021;17(3):e10179. doi:  
666 <https://doi.org/10.15252/msb.202010179>.
- 667 29. Tonner Peter D, Pressman A, Ross D. Interpretable modeling of genotype–phenotype landscapes  
668 with state-of-the-art predictive power. *Proceedings of the National Academy of Sciences.*  
669 2022;119(26):e2114021119. doi: 10.1073/pnas.2114021119.
- 670 30. Sadler JR, Novick A. PROPERTIES OF REPRESSOR AND KINETICS OF ITS ACTION. *Journal of*  
671 *Molecular Biology.* 1965;12(2):305-27. doi: 10.1016/s0022-2836(65)80255-8. PubMed PMID:  
672 WOS:A19656603600001.
- 673 31. Chamness GC, Willson CD. AN UNUSUAL LAC REPRESSOR MUTANT. *Journal of Molecular Biology.*  
674 1970;53(3):561-5. doi: 10.1016/0022-2836(70)90084-7. PubMed PMID: WOS:A1970H871100019.
- 675 32. Jobe A, Bourgeois S. LAC REPRESSOR-OPERATOR INTERACTION VII. REPRESSOR WITH UNIQUE  
676 BINDING PROPERTIES - X86 REPRESSOR. *Journal of Molecular Biology.* 1972;72(1):139-52. doi:  
677 10.1016/0022-2836(72)90075-7. PubMed PMID: WOS:A1972O225800013.
- 678 33. Betz JL, Sadler JR. TIGHT-BINDING REPRESSORS OF LACTOSE OPERON. *Journal of Molecular*  
679 *Biology.* 1976;105(2):293-319. doi: 10.1016/0022-2836(76)90113-3. PubMed PMID:  
680 WOS:A1976CA11900008.
- 681 34. Schmitz A, Coulondre C, Miller JH. GENETIC STUDIES OF LAC REPRESSOR V. REPRESSORS WHICH  
682 BIND OPERATOR MORE TIGHTLY GENERATED BY SUPPRESSION AND REVERSION OF NONSENSE  
683 MUTATIONS. *Journal of Molecular Biology.* 1978;123(3):431-54. doi: 10.1016/0022-2836(78)90089-x.  
684 PubMed PMID: WOS:A1978FM59000008.

- 685 35. Miller JH, Schmeissner U. GENETIC-STUDIES OF THE LAC REPRESSOR X. ANALYSIS OF MISSENSE  
686 MUTATIONS IN THE LACI GENE. *Journal of Molecular Biology*. 1979;131(2):223-48. doi: 10.1016/0022-  
687 2836(79)90074-3. PubMed PMID: WOS:A1979HE03000005.
- 688 36. Miller JH, Coulondre C, Hofer M, Schmeissner U, Sommer H, Schmitz A, et al. GENETIC-STUDIES  
689 OF THE LAC REPRESSOR IX. GENERATION OF ALTERED PROTEINS BY THE SUPPRESSION OF NONSENSE  
690 MUTATIONS. *Journal of Molecular Biology*. 1979;131(2):191-222. doi: 10.1016/0022-2836(79)90073-1.  
691 PubMed PMID: WOS:A1979HE03000004.
- 692 37. Poelwijk Frank J, de Vos Marjon GJ, Tans Sander J. Tradeoffs and Optimality in the Evolution of  
693 Gene Regulation. *Cell*. 2011;146(3):462-70. doi: <https://doi.org/10.1016/j.cell.2011.06.035>.
- 694 38. Meyer S, Ramot R, Kishore Inampudi K, Luo B, Lin C, Amere S, et al. Engineering alternate  
695 cooperative-communications in the lactose repressor protein scaffold. *Protein Engineering, Design and  
696 Selection*. 2013;26(6):433-43. doi: 10.1093/protein/gzt013.
- 697 39. Richards DH, Meyer S, Wilson CJ. Fourteen Ways to Reroute Cooperative Communication in the  
698 Lactose Repressor: Engineering Regulatory Proteins with Alternate Repressive Functions. *ACS Synthetic  
699 Biology*. 2017;6(1):6-12. doi: 10.1021/acssynbio.6b00048.
- 700 40. Chure G, Razo-Mejia M, Belliveau NM, Einav T, Kaczmarek ZA, Barnes SL, et al. Predictive shifts  
701 in free energy couple mutations to their phenotypic consequences. *Proceedings of the National  
702 Academy of Sciences*. 2019;116(37):18275-84. doi: doi:10.1073/pnas.1907869116.
- 703 41. Marzen S, Garcia HG, Phillips R. Statistical Mechanics of Monod–Wyman–Changeux (MWC)  
704 Models. *Journal of Molecular Biology*. 2013;425(9):1433-60. doi:  
705 <https://doi.org/10.1016/j.jmb.2013.03.013>.
- 706 42. Razo-Mejia M, Barnes SL, Belliveau NM, Chure G, Einav T, Lewis M, et al. Tuning Transcriptional  
707 Regulation through Signaling: A Predictive Theory of Allosteric Induction. *Cell Systems*. 2018;6(4):456-  
708 69.e10. doi: 10.1016/j.cels.2018.02.004.
- 709 43. Weinert FM, Brewster RC, Rydenfelt M, Phillips R, Kegel WK. Scaling of Gene Expression with  
710 Transcription-Factor Fugacity. *Physical Review Letters*. 2014;113(25):258101. doi:  
711 10.1103/PhysRevLett.113.258101.
- 712 44. Domingo J, Baeza-Centurion P, Lehner B. The Causes and Consequences of Genetic Interactions  
713 (Epistasis). *Annual Review of Genomics and Human Genetics*. 2019;20(1):433-60. doi: 10.1146/annurev-  
714 genom-083118-014857.
- 715 45. Yu TC, Liu WL, Brinck MS, Davis JE, Shek J, Bower G, et al. Multiplexed characterization of  
716 rationally designed promoter architectures deconstructs combinatorial logic for IPTG-inducible systems.  
717 *Nature Communications*. 2021;12(1):325. doi: 10.1038/s41467-020-20094-3.
- 718 46. Zhou Y, Yuan Y, Wu Y, Li L, Jameel A, Xing X-H, et al. Encoding Genetic Circuits with DNA  
719 Barcodes Paves the Way for Machine Learning-Assisted Metabolite Biosensor Response Curve Profiling  
720 in Yeast. *ACS Synthetic Biology*. 2022;11(2):977-89. doi: 10.1021/acssynbio.1c00595.
- 721 47. Salis HM. *The Ribosome Binding Site Calculator*. Elsevier; 2011. p. 19-42.
- 722 48. Salis HM, Mirsky EA, Voigt CA. Automated design of synthetic ribosome binding sites to control  
723 protein expression. *Nature Biotechnology*. 2009;27(10):946-50. doi: 10.1038/nbt.1568.
- 724 49. Na D, Lee S, Lee D. Mathematical modeling of translation initiation for the estimation of its  
725 efficiency to computationally design mRNA sequences with desired expression levels in prokaryotes.  
726 *BMC Systems Biology*. 2010;4(1):71. doi: 10.1186/1752-0509-4-71.
- 727 50. Seo SW, Yang J-S, Kim I, Yang J, Min BE, Kim S, et al. Predictive design of mRNA translation  
728 initiation region to control prokaryotic translation efficiency. *Metabolic Engineering*. 2013;15:67-74. doi:  
729 10.1016/j.ymben.2012.10.006.
- 730 51. Espah Borujeni A, Channarasappa AS, Salis HM. Translation rate is controlled by coupled trade-  
731 offs between site accessibility, selective RNA unfolding and sliding at upstream standby sites. *Nucleic  
732 Acids Research*. 2014;42(4):2646-59. doi: 10.1093/nar/gkt1139.

- 733 52. Bonde MT, Pedersen M, Klausen MS, Jensen SI, Wulff T, Harrison S, et al. Predictable tuning of  
734 protein expression in bacteria. *Nature Methods*. 2016;13(3):233-6. doi: 10.1038/nmeth.3727.
- 735 53. Reis AC, Salis HM. An Automated Model Test System for Systematic Development and  
736 Improvement of Gene Expression Models. *ACS Synthetic Biology*. 2020;9(11):3145-56. doi:  
737 10.1021/acssynbio.0c00394.
- 738 54. Chen Y-J, Liu P, Nielsen AAK, Brophy JAN, Clancy K, Peterson T, et al. Characterization of 582  
739 natural and synthetic terminators and quantification of their design constraints. *Nature Methods*.  
740 2013;10(7):659-64. doi: 10.1038/nmeth.2515.
- 741 55. LaFleur TL, Hossain A, Salis HM. Automated model-predictive design of synthetic promoters to  
742 control transcriptional profiles in bacteria. *Nature Communications*. 2022;13(1):5159. doi:  
743 10.1038/s41467-022-32829-5.
- 744 56. de Boer CG, Vaishnav ED, Sadeh R, Abeyta EL, Friedman N, Regev A. Deciphering eukaryotic  
745 gene-regulatory logic with 100 million random promoters. *Nature Biotechnology*. 2020;38(1):56-65. doi:  
746 10.1038/s41587-019-0315-8.
- 747 57. Grossman Sharon R, Zhang X, Wang L, Engreitz J, Melnikov A, Rogov P, et al. Systematic  
748 dissection of genomic features determining transcription factor binding and enhancer function.  
749 *Proceedings of the National Academy of Sciences*. 2017;114(7):E1291-E300. doi:  
750 10.1073/pnas.1621150114.
- 751 58. Mogno I, Kwasnieski JC, Cohen BA. Massively parallel synthetic promoter assays reveal the in  
752 vivo effects of binding site variants. *Genome Research*. 2013;23(11):1908-15. doi:  
753 10.1101/gr.157891.113.
- 754 59. van Dijk D, Sharon E, Lotan-Pompan M, Weinberger A, Segal E, Carey LB. Large-scale mapping of  
755 gene regulatory logic reveals context-dependent repression by transcriptional activators. *Genome*  
756 *Research*. 2017;27(1):87-94. doi: 10.1101/gr.212316.116.
- 757 60. Li X, Lehner B. Biophysical ambiguities prevent accurate genetic prediction. *Nature*  
758 *Communications*. 2020;11(1):4923. doi: 10.1038/s41467-020-18694-0.
- 759 61. Gutenkunst RN, Waterfall JJ, Casey FP, Brown KS, Myers CR, Sethna JP. Universally Sloppy  
760 Parameter Sensitivities in Systems Biology Models. *PLOS Computational Biology*. 2007;3(10):e189. doi:  
761 10.1371/journal.pcbi.0030189.
- 762 62. Faure AJ, Domingo J, Schmiedel JM, Hidalgo-Carcedo C, Diss G, Lehner B. Mapping the energetic  
763 and allosteric landscapes of protein binding domains. *Nature*. 2022;604(7904):175-83. doi:  
764 10.1038/s41586-022-04586-4.
- 765 63. Chure G, Kaczmarek ZA, Phillips R. Physiological Adaptability and Parametric Versatility in a  
766 Simple Genetic Circuit. *bioRxiv*. 2019:2019.12.19.878462. doi: 10.1101/2019.12.19.878462.
- 767 64. Sochor MA. In vitro transcription accurately predicts lac repressor phenotype in vivo in  
768 *Escherichia coli*. *PeerJ*. 2014;2:e498. doi: <https://doi.org/10.7717/peerj.498>.
- 769 65. Ilia K, Del Vecchio D. Squaring a Circle: To What Extent Are Traditional Circuit Analogies  
770 Impeding Synthetic Biology? *GEN Biotechnology*. 2022;1(2):150-5. doi: 10.1089/genbio.2021.0014.
- 771 66. Ogawa Y, Katsuyama Y, Ohnishi Y. Engineering of the Ligand Specificity of Transcriptional  
772 Regulator XylS by Deep Mutational Scanning. *ACS Synthetic Biology*. 2022;11(1):473-85. doi:  
773 10.1021/acssynbio.1c00564.
- 774 67. Libis V, Delépine B, Faulon J-L. Sensing new chemicals with bacterial transcription factors.  
775 *Current Opinion in Microbiology*. 2016;33:105-12. doi: <https://doi.org/10.1016/j.mib.2016.07.006>.
- 776 68. Glasgow Anum A, Huang Y-M, Mandell Daniel J, Thompson M, Ritterson R, Loshbaugh Amanda L,  
777 et al. Computational design of a modular protein sense-response system. *Science*. 2019;366(6468):1024-  
778 8. doi: 10.1126/science.aax8780.



- 779 69. Sarkar S, Tack D, Ross D. Sparse estimation of mutual information landscapes quantifies  
780 information transmission through cellular biochemical reaction networks. *Communications Biology*.  
781 2020;3(1):203. doi: 10.1038/s42003-020-0901-9.
- 782 70. Ross D. Automated analysis of bacterial flow cytometry data with FlowGateNIST. *PLOS ONE*.  
783 2021;16(8):e0250753. doi: 10.1371/journal.pone.0250753.
- 784 71. Castillo-Hair SM, Sexton JT, Landry BP, Olson EJ, Igoshin OA, Tabor JJ. FlowCal: A User-Friendly,  
785 Open Source Software Tool for Automatically Converting Flow Cytometry Data from Arbitrary to  
786 Calibrated Units. *ACS Synthetic Biology*. 2016;5(7):774-80. doi: 10.1021/acssynbio.5b00284.
- 787 72. Gaigalas A, Wang L, DeRose PC. Assignment of the Number of Equivalent Reference  
788 Fluorophores to Dyed Microspheres. *Journal of Research of the National Institute of Standards and*  
789 *Technology*. 2016;121:264-81.
- 790 73. Schwartz A, Gaigalas AK, Wang L, Marti GE, Vogt RF, Fernandez-Repollet E. Formalization of the  
791 MESF unit of fluorescence intensity. *Cytometry*. 2004;57B(1):1-6. doi: 10.1002/cyto.b.10066.
- 792 74. Carpenter B, Gelman A, Hoffman MD, Lee D, Goodrich B, Betancourt M, et al. Stan: A  
793 Probabilistic Programming Language. *Journal of Statistical Software*. 2017;76(1):1 - 32. doi:  
794 10.18637/jss.v076.i01.
- 795 75. Blei DM, Kucukelbir A, McAuliffe JD. Variational Inference: A Review for Statisticians. *Journal of*  
796 *the American Statistical Association*. 2017;112(518):859-77. doi: 10.1080/01621459.2017.1285773.
- 797 76. Lewis M, Chang G, Horton NC, Kercher MA, Pace HC, Schumacher MA, et al. Crystal Structure of  
798 the Lactose Operon Repressor and Its Complexes with DNA and Inducer. *Science*. 1996;271(5253):1247-  
799 54. doi: doi:10.1126/science.271.5253.1247.

800
